# Supplementary material
Source: publisher figshare collection journal article supplement (https://future-science-group.figshare.com/ndownloader/files/33851525)
Supplement: Supplementary file 1 [file 33851525]

Supplementary Material 8 Additional parameters

| Definition and symbol of parameter | Value of parameter |
| --- | --- |
| Contract negotiation costs, (thousand $USD) | 25 |
| Contract negotiation duration, (years) | 0.5 |
| Interest rate, (%) | 10 |
| Time horizon, (years) | 20 |
| Transportation cost per mile ($USD) | 1 |
| Maximum operating days, (days) | 292 |
| Facility operating cost, (thousand $USD per m2 per year) | 1.5 |
| Location penalty multiplier ()  London  Other locations | 1.1  1 |
| Funding available, (million $USD) | 27 |
